# Supplementary material for: A process evaluation plan for assessing a complex community-based maternal health intervention in Ogun State, Nigeria
Source: Springer Nature journal article supplement (doi:10.1186/s12913-017-2124-4), 2017-03-28
Supplement: MOESM5 [file 12183070]

- Patient information
- Contact details
- Initial assessment (emergency conditions)
- Pregnancy status
- Fetal status
- Date of delivery
- Blood pressure
- Urinary protein (on first visits and if hypertensive)
- Estimated date of delivery
- Symptoms (if hypertensive)
- Recommendations (generated by the POM application)
- Follow-up
- Adverse events (hematoma, infection at injection site and injury related to transport)
